# Supplementary material for: Direct and Bicarbonate-Induced Iron Deficiency Differently Affect Iron Translocation in Kiwifruit Roots
Source: PubMed Central journal article supplement (PMC7696116; doi:10.3390/plants9111578), 2020-11-14
Supplement: plants-09-01578-s001.pdf [file plants-09-01578-s001.pdf]

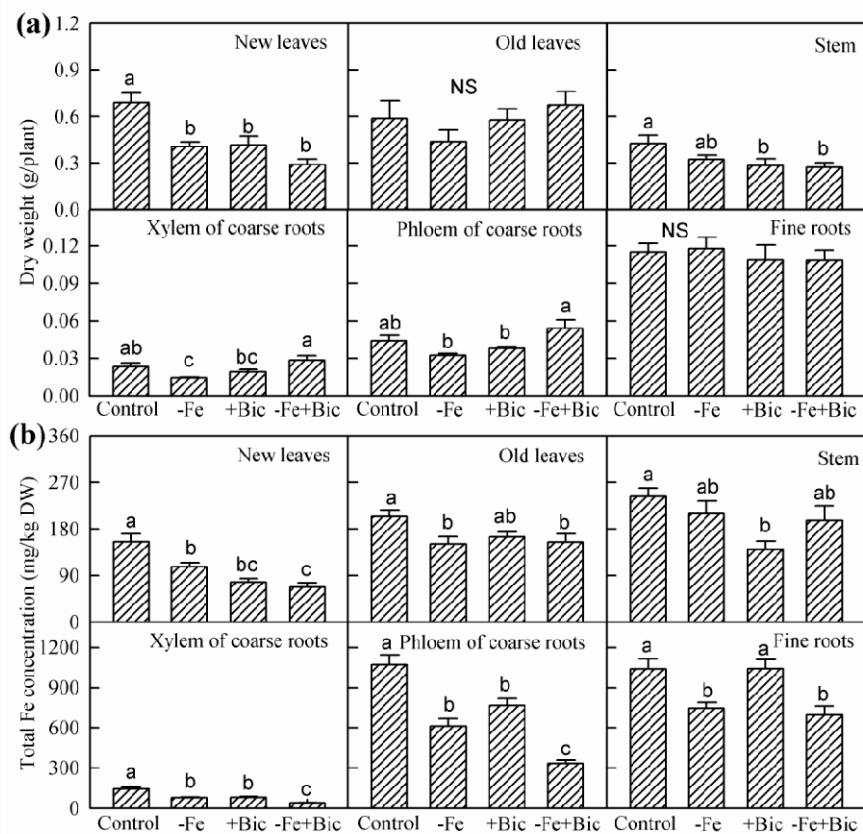

**Figure S1.** The dry weight (a) and total Fe concentration (b) in various parts of kiwifruit plants treated with -Fe, +Bic or -Fe+Bic in solution culture for 35 days. Values are means of five replicates  $\pm$  SE. Different letters indicate significant differences among the treatments for the same plant part at  $p < 0.05$ . DW, dry weight; NS, not significant.
